# Supplementary material
Source: Springer Nature journal article supplement (https://www.springermedizin.de/resource/supplementary/12882_2012_525_MOESM3_ESM.pdf/9453748)

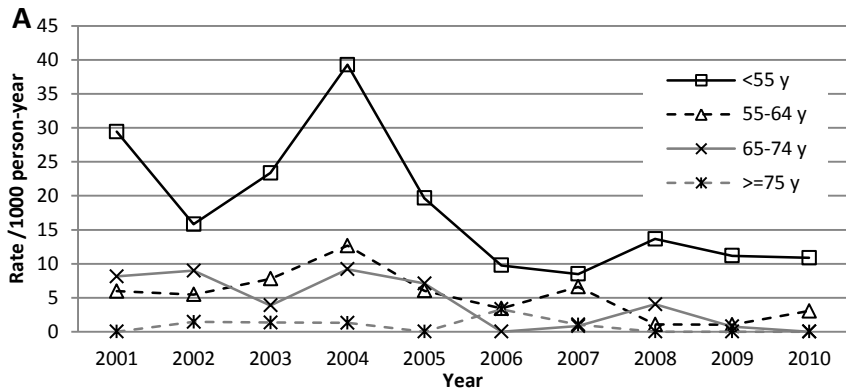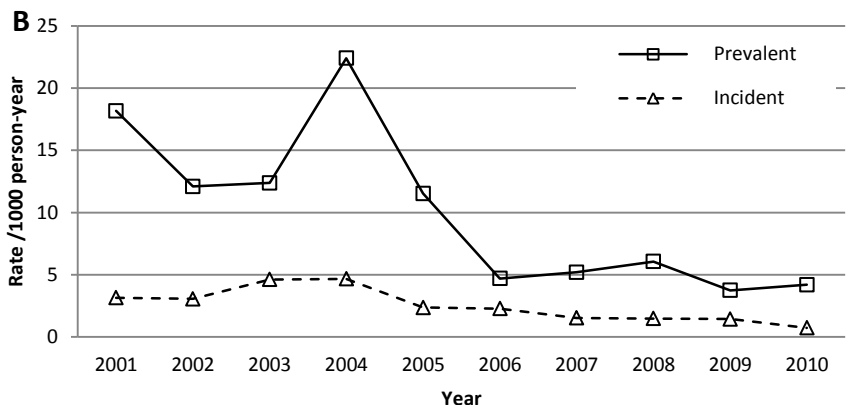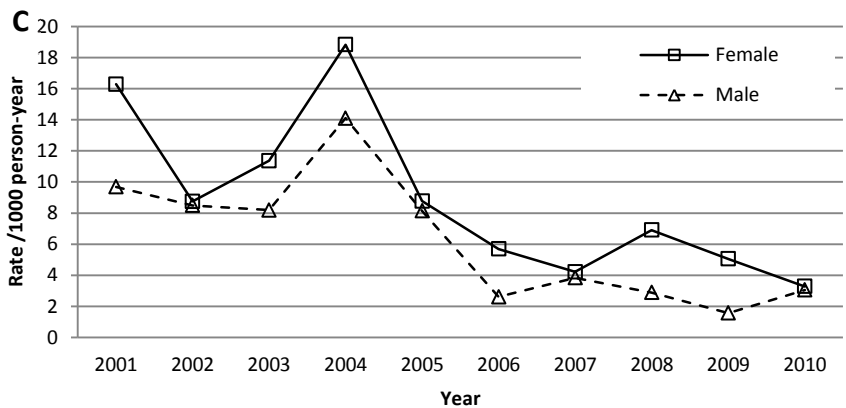

Supplement: MOESM3 [file 9453748]
